# Supplementary material
Source: Springer Nature journal article supplement (https://www.springermedizin.de/resource/supplementary/12936_2013_2764_MOESM6_ESM.pdf/9544214)

Number of attendances and stays

MIS

Outpatients 2009

Outpatients 2010

Inpatients 2009

Inpatients 2010

Jan

Apr

Jul

Oct

Dec

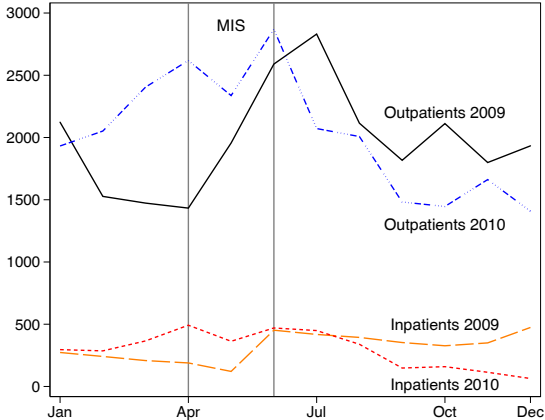

Supplement: MOESM6 [file 9544214]
